# Supplementary material
Source: PubMed Central journal article supplement (PMC3903180)
Supplement: NIHMS501671-supplement-1.pdf [file NIHMS501671-supplement-1.pdf]

**Supplementary Figures (S1-S3) and Supplementary Tables (S1-S10)**

**The RAG2 C-terminus and ATM protect genome integrity by controlling antigen receptor gene cleavage**

Julie Chaumeil, Mariann Micsinai, Panagiotis Ntziachristos, David B. Roth, Iannis Aifantis, Yuval Kluger, Ludovic Deriano, & Jane A. Skok.

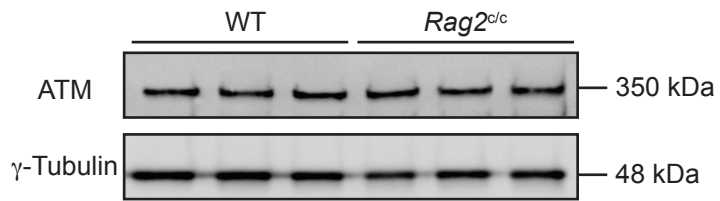

**Supplementary Figure S1** | Western blot showing levels of ATM in WT and *Rag2<sup>cc</sup>* thymocytes.  $\gamma$ -Tubulin was used as a control.

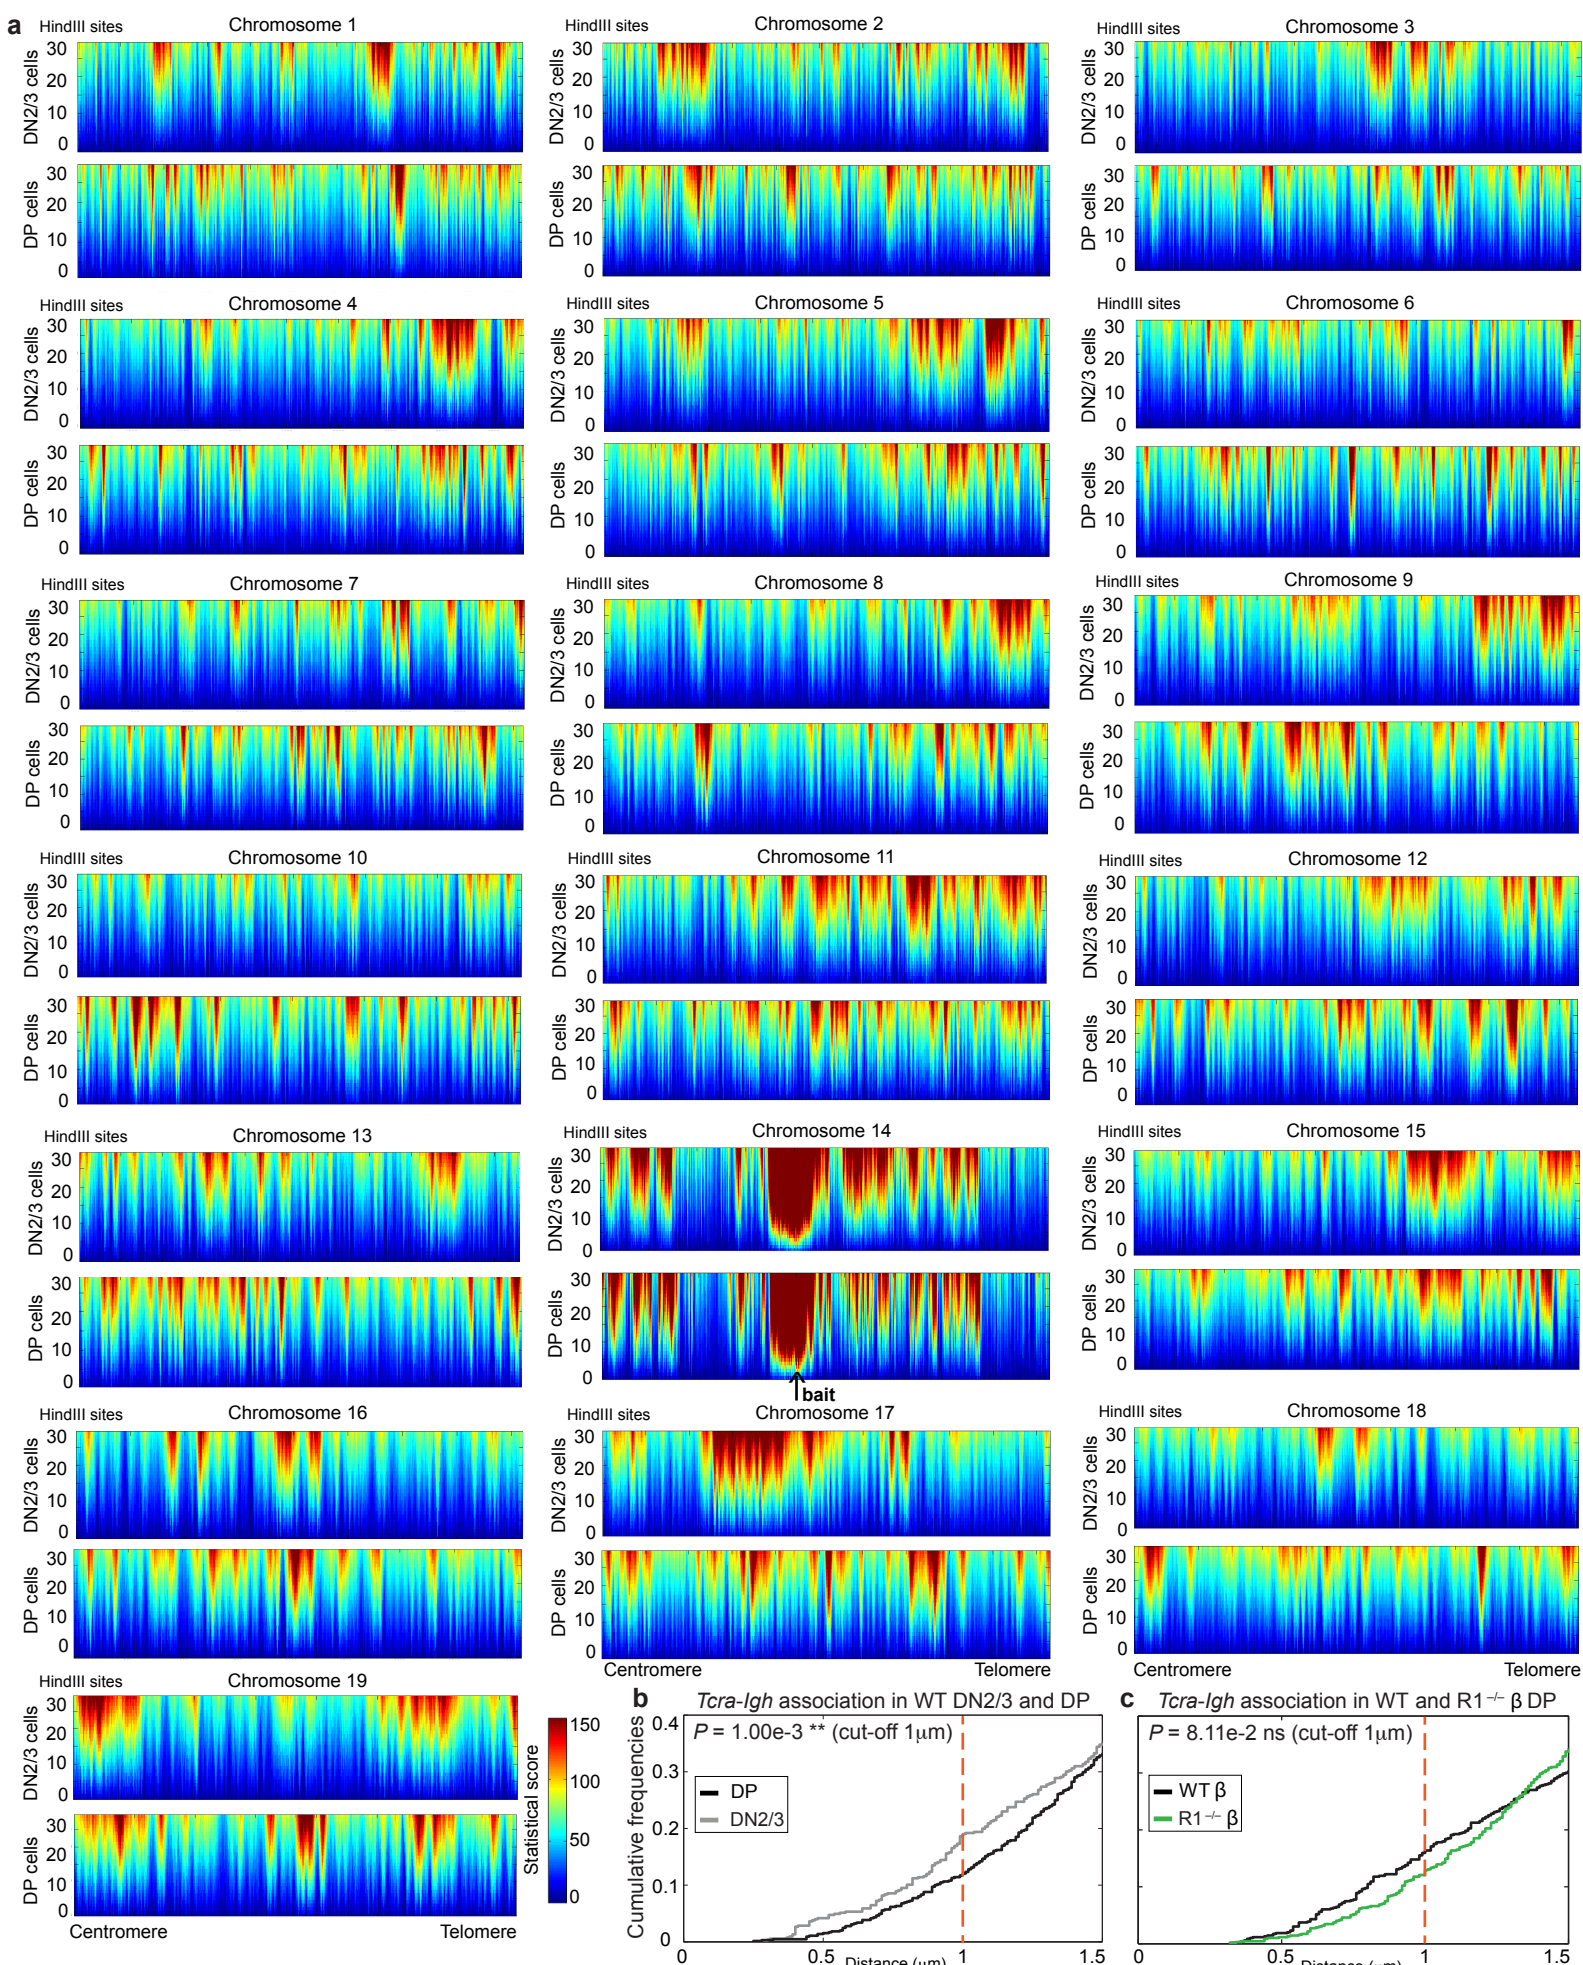

**Supplementary Figure S2** | (a) 4C-seq - Domainograms for all the autosomes. See also Table S2. (b,c) Cumulative frequency curves (cut-off at  $1.5\mu\text{m}$ ) for inter-locus distances of *Tcra* and *Igh* alleles in WT DN2/3 and DP cells (b), WT  $\beta$  and  $R1^{-/-}$   $\beta$  DP cells (c).  $P$ -values were calculated using a two-tail Fisher exact test for a cut-off at  $1\mu\text{m}$ . See Fig. 3 and Supplementary Table S3.

- Wild-type DP cells -  
Mono-locus recombination of *Tcra* or *Igh*

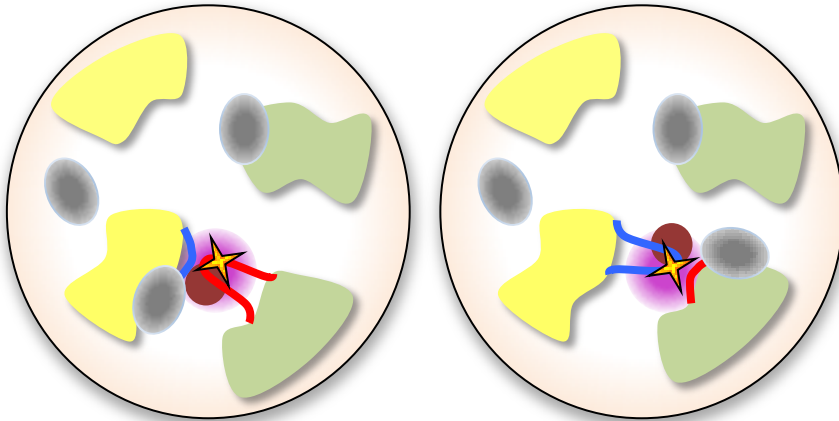

RAG-mediated *Tcra* / *Igh* pairing with mono-locus looping out of one locus. After mono-locus RAG-mediated cleavage, ATM and RAG2 C-terminus mediate the repositioning of the other locus to pericentromeric heterochromatin (PCH) and the modulation of looping, to prevent further cleavage.

- Mutant DP cells -  
Bi-locus recombination of *Tcra* and *Igh*  
in absence of ATM or RAG2 C-terminus

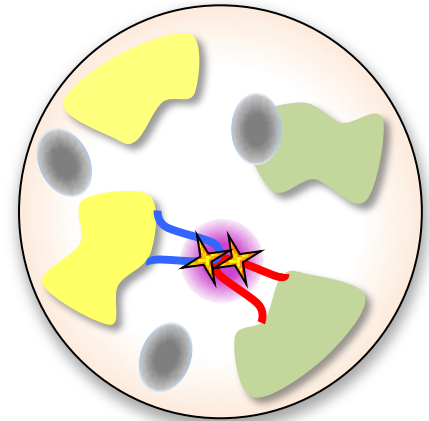

Pairing and looping out of both loci. No repositioning to PCH or modulation of looping: Bi-locus cleavage and damage.

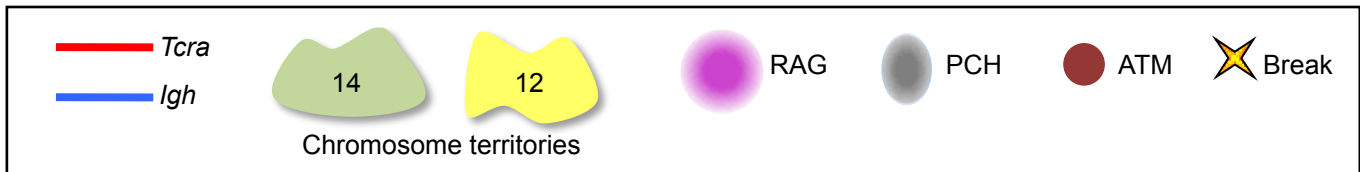

Supplementary Figure S3 | Model.

## SUPPLEMENTARY TABLES

Statistical analyses were performed using a two-tail Fisher exact test or a two-tail  $\chi^2$  test (Significance at  $\alpha = 0.05$ ).

|      |                            |                    |
|------|----------------------------|--------------------|
| ns = | $P > 5.00e-2$              | Not significant    |
| *    | $1.00e-2 < P \leq 5.00e-2$ | Significant        |
| **   | $1.00e-3 < P \leq 1.00e-2$ | Very significant   |
| ***  | $P \leq 1.00e-3$           | Highly significant |

### Supplementary Table S1.

Promiscuous *Igh* rearrangement overlaps with *Tcrd* and *Tcra* recombination in DN2/3 and DP cells (Fig. 1c).

| <i>Igh</i>                                       |                           |              | No association |             | $\gamma$ -H2AX association |             | Sample size  |
|--------------------------------------------------|---------------------------|--------------|----------------|-------------|----------------------------|-------------|--------------|
|                                                  |                           |              | number         | %           | number                     | %           | (alleles)    |
| DN2/3                                            | WT                        | Exp1         | 203            | 95.5        | 9                          | 4.2         | 212          |
|                                                  |                           | Exp2         | 291            | 92.7        | 23                         | 7.3         | 314          |
|                                                  |                           | <b>TOTAL</b> | <b>494</b>     | <b>93.9</b> | <b>32</b>                  | <b>6.1</b>  | <b>526</b>   |
| DN2/3                                            | R1 <sup>-/-</sup>         | Exp1         | 298            | 97.4        | 8                          | 2.6         | 306          |
|                                                  |                           | Exp2         | 190            | 96.9        | 6                          | 3.1         | 196          |
|                                                  |                           | <b>TOTAL</b> | <b>488</b>     | <b>97.2</b> | <b>14</b>                  | <b>2.8</b>  | <b>502</b>   |
| DP                                               | WT                        | Exp1         | 212            | 96.4        | 8                          | 3.6         | 220          |
|                                                  |                           | Exp2         | 413            | 96.5        | 15                         | 3.5         | 428          |
|                                                  |                           | <b>TOTAL</b> | <b>625</b>     | <b>96.5</b> | <b>23</b>                  | <b>3.5</b>  | <b>648</b>   |
| DP                                               | R1 <sup>-/-</sup> $\beta$ | Exp1         | 225            | 98.7        | 3                          | 1.3         | 228          |
|                                                  |                           | Exp2         | 459            | 98.1        | 9                          | 1.9         | 468          |
|                                                  |                           | <b>TOTAL</b> | <b>684</b>     | <b>98.3</b> | <b>12</b>                  | <b>1.7</b>  | <b>696</b>   |
| <i>Statistical analysis (Fisher exact test).</i> |                           |              |                |             | <i>P-value</i>             |             | <i>Level</i> |
| WT                                               | vs. R1 <sup>-/-</sup>     | DN2/3        |                |             | 1.07e-2                    |             | *            |
|                                                  |                           | DP           |                |             | 3.58e-2                    |             | *            |
| <i>Tcra/d</i>                                    |                           |              | No association |             | $\gamma$ -H2AX association |             | Sample size  |
|                                                  |                           |              | number         | %           | number                     | %           | (alleles)    |
| DN2/3                                            | WT                        | Exp1         | 192            | 90.6        | 20                         | 9.4         | 212          |
|                                                  |                           | Exp2         | 290            | 92.4        | 24                         | 7.6         | 314          |
|                                                  |                           | <b>TOTAL</b> | <b>482</b>     | <b>91.6</b> | <b>44</b>                  | <b>8.4</b>  | <b>526</b>   |
| DN2/3                                            | R1 <sup>-/-</sup>         | Exp1         | 299            | 97.7        | 7                          | 2.3         | 306          |
|                                                  |                           | Exp2         | 192            | 98          | 4                          | 2           | 196          |
|                                                  |                           | <b>TOTAL</b> | <b>491</b>     | <b>97.8</b> | <b>11</b>                  | <b>2.2</b>  | <b>502</b>   |
| DP                                               | WT                        | Exp1         | 147            | 66.8        | 73                         | 33.2        | 220          |
|                                                  |                           | Exp2         | 266            | 62.1        | 162                        | 37.9        | 428          |
|                                                  |                           | <b>TOTAL</b> | <b>413</b>     | <b>63.7</b> | <b>235</b>                 | <b>36.3</b> | <b>648</b>   |
| DP                                               | R1 <sup>-/-</sup> $\beta$ | Exp1         | 220            | 96.5        | 8                          | 3.5         | 228          |
|                                                  |                           | Exp2         | 438            | 93.6        | 30                         | 6.4         | 468          |
|                                                  |                           | <b>TOTAL</b> | <b>658</b>     | <b>94.5</b> | <b>38</b>                  | <b>5.5</b>  | <b>696</b>   |
| <i>Statistical analysis (Fisher exact test).</i> |                           |              |                |             | <i>P-value</i>             |             | <i>Level</i> |
| WT                                               | vs. R1 <sup>-/-</sup>     | DN2/3        |                |             | 1.10e-5                    |             | ***          |
|                                                  |                           | DP           |                |             | 1.10e-44                   |             | ***          |

**Supplementary Table S2.**

**The C-terminus of RAG2 and ATM regulate mono-locus RAG-mediated cleavage in DN2/3 cells.**

|                                                  |                                        | No $\gamma$ -H2AX association |             | $\gamma$ -H2AX association |            | Sample size  |
|--------------------------------------------------|----------------------------------------|-------------------------------|-------------|----------------------------|------------|--------------|
|                                                  |                                        | number                        | %           | number                     | %          | (cells)      |
| Exp1                                             | WT                                     | 213                           | 96.8        | 7                          | 3.2        | 220          |
|                                                  | R1 <sup>-/-</sup>                      | 220                           | 100         | 0                          | 0          | 220          |
| Exp2                                             | WT                                     | 115                           | 95.8        | 5                          | 4.2        | 120          |
|                                                  | R1 <sup>-/-</sup>                      | 112                           | 100         | 0                          | 0          | 112          |
| Exp1                                             | WT                                     | 202                           | 98.5        | 3                          | 1.5        | 205          |
|                                                  | 53bp1 <sup>-/-</sup>                   | 186                           | 98.9        | 2                          | 1.1        | 188          |
| Exp2                                             | WT                                     | 98                            | 98          | 2                          | 2          | 100          |
|                                                  | 53bp1 <sup>-/-</sup>                   | 115                           | 98.3        | 2                          | 1.7        | 117          |
| Exp1                                             | WT                                     | 152                           | 96.8        | 5                          | 3.2        | 157          |
|                                                  | Atm <sup>-/-</sup>                     | 137                           | 90.7        | 14                         | 9.3        | 151          |
| Exp2                                             | WT                                     | 104                           | 98.1        | 2                          | 1.9        | 106          |
|                                                  | Atm <sup>-/-</sup>                     | 98                            | 94.2        | 6                          | 5.8        | 104          |
| Exp1                                             | WT                                     | 104                           | 98.1        | 2                          | 1.9        | 106          |
|                                                  | Rag2 <sup>c/c</sup>                    | 102                           | 91.1        | 10                         | 8.9        | 112          |
|                                                  | Rag2 <sup>c/c</sup> p53 <sup>-/-</sup> | 107                           | 96.4        | 4                          | 3.6        | 111          |
| Exp2                                             | WT                                     | 152                           | 96.8        | 5                          | 3.2        | 157          |
|                                                  | Rag2 <sup>c/c</sup>                    | 123                           | 93.9        | 8                          | 6.1        | 131          |
|                                                  | Rag2 <sup>c/c</sup> p53 <sup>-/-</sup> | 140                           | 92.7        | 11                         | 7.3        | 151          |
| <b>TOTAL : WT</b>                                |                                        | <b>1140</b>                   | <b>97.4</b> | <b>31</b>                  | <b>2.6</b> | <b>1171</b>  |
| <b>R1<sup>-/-</sup></b>                          |                                        | <b>332</b>                    | <b>100</b>  | <b>0</b>                   | <b>0</b>   | <b>332</b>   |
| <b>53bp1<sup>-/-</sup></b>                       |                                        | <b>301</b>                    | <b>98.7</b> | <b>4</b>                   | <b>1.3</b> | <b>305</b>   |
| <b>Atm<sup>-/-</sup></b>                         |                                        | <b>235</b>                    | <b>92.2</b> | <b>20</b>                  | <b>7.8</b> | <b>255</b>   |
| <b>Rag2<sup>c/c</sup></b>                        |                                        | <b>225</b>                    | <b>92.6</b> | <b>18</b>                  | <b>7.4</b> | <b>243</b>   |
| <b>Rag2<sup>c/c</sup> p53<sup>-/-</sup></b>      |                                        | <b>247</b>                    | <b>94.3</b> | <b>15</b>                  | <b>5.7</b> | <b>262</b>   |
| <i>Statistical analysis (Fisher exact test).</i> |                                        |                               |             | <i>P-value</i>             |            | <i>Level</i> |
| WT vs. R1 <sup>-/-</sup>                         |                                        |                               |             | 2.74e-3                    |            | **           |
| WT vs. 53bp1 <sup>-/-</sup>                      |                                        |                               |             | 1.72e-1                    |            | ns           |
| WT vs. Atm <sup>-/-</sup>                        |                                        |                               |             | 5.10e-5                    |            | ***          |
| WT vs. Rag2 <sup>c/c</sup>                       |                                        |                               |             | 2.20e-4                    |            | ***          |
| WT vs. Rag2 <sup>c/c</sup> p53 <sup>-/-</sup>    |                                        |                               |             | 1.06e-2                    |            | *            |

**Supplementary Table S3.**

**The C-terminus of RAG2 and ATM regulate mono-locus RAG-mediated cleavage in DP cells.**

|                                                  | No $\gamma$ -H2AX association |             | $\gamma$ -H2AX association |              | Sample size (cells) |
|--------------------------------------------------|-------------------------------|-------------|----------------------------|--------------|---------------------|
|                                                  | number                        | %           | number                     | %            |                     |
| Exp1 WT                                          | 229                           | 95.8        | 10                         | 4.2          | 239                 |
| R1 <sup>-/-</sup> $\beta$                        | 229                           | 97.9        | 5                          | 2.1          | 234                 |
| Exp2 WT                                          | 106                           | 96.4        | 4                          | 3.6          | 110                 |
| R1 <sup>-/-</sup> $\beta$                        | 113                           | 99.1        | 1                          | 0.9          | 114                 |
| Exp1 WT                                          | 199                           | 96.1        | 8                          | 3.9          | 207                 |
| 53bp1 <sup>-/-</sup>                             | 210                           | 95.9        | 9                          | 4.1          | 219                 |
| Exp2 WT                                          | 107                           | 100         | 0                          | 0            | 107                 |
| 53bp1 <sup>-/-</sup>                             | 100                           | 96.2        | 4                          | 3.8          | 104                 |
| Exp1 WT                                          | 204                           | 95.3        | 10                         | 4.7          | 214                 |
| Atm <sup>-/-</sup>                               | 175                           | 81.8        | 39                         | 18.2         | 214                 |
| Exp2 WT                                          | 104                           | 94.5        | 6                          | 5.5          | 110                 |
| Atm <sup>-/-</sup>                               | 88                            | 83          | 18                         | 17           | 106                 |
| Exp1 WT                                          | 95                            | 95          | 5                          | 5            | 100                 |
| Rag2 <sup>c/c</sup>                              | 82                            | 81.2        | 19                         | 18.8         | 101                 |
| Rag2 <sup>c/c</sup> p53 <sup>-/-</sup>           | 176                           | 83.4        | 35                         | 16.6         | 211                 |
| Exp2 WT                                          | 101                           | 98.1        | 2                          | 1.9          | 103                 |
| Rag2 <sup>c/c</sup>                              | 83                            | 82.2        | 18                         | 17.8         | 101                 |
| Rag2 <sup>c/c</sup> p53 <sup>-/-</sup>           | 92                            | 83.6        | 18                         | 16.4         | 110                 |
| <b>TOTAL : WT</b>                                | <b>1145</b>                   | <b>96.2</b> | <b>45</b>                  | <b>3.8</b>   | <b>1190</b>         |
| <b>R1<sup>-/-</sup></b>                          | <b>342</b>                    | <b>98.3</b> | <b>6</b>                   | <b>1.7</b>   | <b>348</b>          |
| <b>53bp1<sup>-/-</sup></b>                       | <b>310</b>                    | <b>96</b>   | <b>13</b>                  | <b>4</b>     | <b>323</b>          |
| <b>Atm<sup>-/-</sup></b>                         | <b>263</b>                    | <b>82.2</b> | <b>57</b>                  | <b>17.8</b>  | <b>320</b>          |
| <b>Rag2<sup>c/c</sup></b>                        | <b>164</b>                    | <b>81.7</b> | <b>37</b>                  | <b>18.3</b>  | <b>202</b>          |
| <b>Rag2<sup>c/c</sup> p53<sup>-/-</sup></b>      | <b>268</b>                    | <b>83.5</b> | <b>53</b>                  | <b>16.5</b>  | <b>321</b>          |
| <i>Statistical analysis (Fisher exact test).</i> |                               |             | <i>P-value</i>             | <i>Level</i> |                     |
| WT vs. R1 <sup>-/-</sup>                         |                               |             | 5.84e-2                    | ns           |                     |
| WT vs. 53bp1 <sup>-/-</sup>                      |                               |             | 8.40e-1                    | ns           |                     |
| WT vs. Atm <sup>-/-</sup>                        |                               |             | 6.80e-19                   | ***          |                     |
| WT vs. Rag2 <sup>c/c</sup>                       |                               |             | 3.80e-16                   | ***          |                     |
| WT vs. Rag2 <sup>c/c</sup> p53 <sup>-/-</sup>    |                               |             | 2.10e-16                   | ***          |                     |

**Supplementary Table S4.****4C-seq data (Fig. 3a and Fig. S2a).**

|                                                | <i>Tcra DN</i> | <i>Tcra DP</i> |
|------------------------------------------------|----------------|----------------|
| Total number of reads sequenced                | 3,674,583      | 2,559,768      |
| Number of mapped reads after pre-preprocessing | 917,974        | 943,119        |
| DP_mnase_Input                                 | 3,674,583      | 2,559,768      |
| Reads per chromosome:                          |                |                |
| 1                                              | 20105          | 31200          |
| 2                                              | 23206          | 34885          |
| 3                                              | 15238          | 21522          |
| 4                                              | 17115          | 25664          |
| 5                                              | 19322          | 26764          |
| 6                                              | 15048          | 24880          |
| 7                                              | 15885          | 24321          |
| 8                                              | 12539          | 18287          |
| 9                                              | 12575          | 17492          |
| 10                                             | 11231          | 20253          |
| 11                                             | 22392          | 29869          |
| 12                                             | 12493          | 20067          |
| 13                                             | 11478          | 18034          |
| 14                                             | 658135         | 551444         |
| 15                                             | 11403          | 16634          |
| 16                                             | 8260           | 14012          |
| 17                                             | 13030          | 18414          |
| 18                                             | 6386           | 10979          |
| 19                                             | 8379           | 12851          |
| X                                              | 3615           | 5356           |
| Y                                              | 139            | 191            |

**Supplementary Table S5.****ChIP-seq data (Fig. 3c and 5a).**

| <i>Histone marks</i> | <i>Mapped reads</i> | <i>Unique mapped reads</i> |
|----------------------|---------------------|----------------------------|
| DN_H3K4me3           | 9,368,703           | 8,783,451                  |
| DN_H3K9Ac            | 15,428,075          | 13,345,701                 |
| DN_mnase_Input       | 10,644,827          | 10,191,160                 |
| DP_H3K4me3           | 12,466,417          | 11,412,239                 |
| DP_H3K9Ac            | 12,482,225          | 10,466,783                 |
| DP_mnase_Input       | 13,332,872          | 12,858,986                 |



**Supplementary Table S6.**

**Frequency of  $\gamma$ -H2AX association on *Tcra* and/or *Igh* alleles in *Tcra-Igh* pairs in DP cells (Fig. 4a).**

| Frequency of $\gamma$ -H2AX association:                 | No $\gamma$ -H2AX association |                                                             | $\gamma$ -H2AX association    |             |                                        |             |                                                                 |              | Sample size (pairs) |
|----------------------------------------------------------|-------------------------------|-------------------------------------------------------------|-------------------------------|-------------|----------------------------------------|-------------|-----------------------------------------------------------------|--------------|---------------------|
|                                                          | number                        | %                                                           | On <i>Tcra</i>                |             | On both <i>Tcra</i> / <i>Igh</i>       |             | On <i>Igh</i>                                                   |              |                     |
|                                                          |                               |                                                             | number                        | %           | number                                 | %           | number                                                          | %            |                     |
| Exp1 WT                                                  | 76                            | 58.5                                                        | 48                            | 36.9        | 6                                      | 4.6         | 0                                                               | 0            | 130                 |
| <i>53bp1</i> <sup>-/-</sup>                              | 26                            | 53.1                                                        | 20                            | 40.8        | 3                                      | 6.1         | 0                                                               | 0            | 49                  |
| <i>Atm</i> <sup>-/-</sup>                                | 36                            | 47.4                                                        | 17                            | 22.4        | 18                                     | 23.7        | 5                                                               | 6.6          | 76                  |
| <i>Rag2</i> <sup>c/c</sup>                               | 24                            | 51.1                                                        | 14                            | 29.8        | 8                                      | 17          | 1                                                               | 2.1          | 47                  |
| <i>Rag2</i> <sup>c/c</sup> <i>p53</i> <sup>-/-</sup>     | 47                            | 54                                                          | 22                            | 25.3        | 12                                     | 13.8        | 6                                                               | 6.9          | 87                  |
| Exp2 WT                                                  | 61                            | 61                                                          | 38                            | 38          | 1                                      | 1           | 0                                                               | 0            | 100                 |
| <i>53bp1</i> <sup>-/-</sup>                              | 24                            | 63.2                                                        | 13                            | 34.2        | 1                                      | 2.6         | 0                                                               | 0            | 38                  |
| <i>Atm</i> <sup>-/-</sup>                                | 20                            | 33.3                                                        | 31                            | 51.7        | 9                                      | 15          | 0                                                               | 0            | 60                  |
| <i>Rag2</i> <sup>c/c</sup>                               | 19                            | 45.2                                                        | 14                            | 33.3        | 5                                      | 11.9        | 4                                                               | 9.5          | 42                  |
| <i>Rag2</i> <sup>c/c</sup> <i>p53</i> <sup>-/-</sup>     | 35                            | 66                                                          | 11                            | 20.8        | 6                                      | 11.3        | 1                                                               | 1.9          | 53                  |
| <b>TOTAL WT</b>                                          | <b>137</b>                    | <b>59.6</b>                                                 | <b>86</b>                     | <b>37.4</b> | <b>7</b>                               | <b>3</b>    | <b>0</b>                                                        | <b>0</b>     | <b>230</b>          |
| <i>53bp1</i> <sup>-/-</sup>                              | <b>50</b>                     | <b>57.5</b>                                                 | <b>33</b>                     | <b>37.9</b> | <b>4</b>                               | <b>4.6</b>  | <b>0</b>                                                        | <b>0</b>     | <b>87</b>           |
| <i>Atm</i> <sup>-/-</sup>                                | <b>56</b>                     | <b>41.2</b>                                                 | <b>48</b>                     | <b>35.3</b> | <b>27</b>                              | <b>19.9</b> | <b>5</b>                                                        | <b>3.7</b>   | <b>136</b>          |
| <i>Rag2</i> <sup>c/c</sup>                               | <b>43</b>                     | <b>48.3</b>                                                 | <b>28</b>                     | <b>31.5</b> | <b>13</b>                              | <b>14.6</b> | <b>5</b>                                                        | <b>5.6</b>   | <b>89</b>           |
| <i>Rag2</i> <sup>c/c</sup> <i>p53</i> <sup>-/-</sup>     | <b>82</b>                     | <b>58.6</b>                                                 | <b>33</b>                     | <b>23.6</b> | <b>18</b>                              | <b>12.9</b> | <b>7</b>                                                        | <b>5</b>     | <b>140</b>          |
| <i>Statistical analysis (Fisher exact test).</i>         |                               |                                                             |                               |             |                                        |             | <i>P-value</i>                                                  | <i>Level</i> |                     |
| Entire distribution                                      |                               | WT vs. <i>53bp1</i> <sup>-/-</sup>                          |                               |             |                                        | 7.82e-1     |                                                                 | ns           |                     |
|                                                          |                               | WT vs. <i>Atm</i> <sup>-/-</sup>                            |                               |             |                                        | 1.00e-8     |                                                                 | ***          |                     |
|                                                          |                               | WT vs. <i>Rag2</i> <sup>c/c</sup>                           |                               |             |                                        | 2.60e-6     |                                                                 | ***          |                     |
|                                                          |                               | WT vs. <i>Rag2</i> <sup>c/c</sup> <i>p53</i> <sup>-/-</sup> |                               |             |                                        | 2.10e-6     |                                                                 | ***          |                     |
| $\gamma$ -H2AX on both <i>Tcra</i> / <i>Igh</i>          |                               | WT vs. <i>53bp1</i> <sup>-/-</sup>                          |                               |             |                                        | 5.00e-1     |                                                                 | ns           |                     |
|                                                          |                               | WT vs. <i>Atm</i> <sup>-/-</sup>                            |                               |             |                                        | 8.60e-8     |                                                                 | ***          |                     |
|                                                          |                               | WT vs. <i>Rag2</i> <sup>c/c</sup>                           |                               |             |                                        | 1.30e-4     |                                                                 | ***          |                     |
|                                                          |                               | WT vs. <i>Rag2</i> <sup>c/c</sup> <i>p53</i> <sup>-/-</sup> |                               |             |                                        | 2.60e-4     |                                                                 | ***          |                     |
| <b>Frequency of <i>Tcra-Igh</i> pairing in DP cells:</b> |                               |                                                             | <b>Paired <i>Tcra-Igh</i></b> |             | <b>Total <i>Tcra-Igh</i> distances</b> |             | <i>Statistical analysis (Fisher exact test). WT vs. Mutant:</i> |              |                     |
|                                                          |                               |                                                             | number                        | %           |                                        |             | <i>P-value</i>                                                  | <i>Level</i> |                     |
| <b>TOTAL WT</b>                                          |                               |                                                             | <b>230</b>                    | <b>13.7</b> | <b>1682</b>                            |             | -                                                               | -            |                     |
| <i>53bp1</i> <sup>-/-</sup>                              |                               |                                                             | <b>87</b>                     | <b>13.5</b> | <b>646</b>                             |             | 9.10e-1                                                         | ns           |                     |
| <i>Atm</i> <sup>-/-</sup>                                |                               |                                                             | <b>136</b>                    | <b>21.3</b> | <b>640</b>                             |             | 1.70e-4                                                         | ***          |                     |
| <i>Rag2</i> <sup>c/c</sup>                               |                               |                                                             | <b>89</b>                     | <b>22</b>   | <b>404</b>                             |             | 4.40e-4                                                         | ***          |                     |
| <i>Rag2</i> <sup>c/c</sup> <i>p53</i> <sup>-/-</sup>     |                               |                                                             | <b>140</b>                    | <b>21.8</b> | <b>642</b>                             |             | 5.80e-5                                                         | ***          |                     |

**Supplementary Table S7. RAG mediated heterologous pairing is not a general phenomenon that occurs between RAG2 enriched genes. Pairing between loci in individual DN2/3 and DP cells (Fig. 5b,c).**

|                    | WT DN2/3       |      | R1 <sup>-/-</sup> DN2/3 |      | WT DP          |      |
|--------------------|----------------|------|-------------------------|------|----------------|------|
|                    | Paired / Total | %    | Paired / Total          | %    | Paired / Total | %    |
| <i>Tcra-Igh</i>    | 184 / 892      | 20.6 | 90 / 664                | 13.6 | 76 / 648       | 11.7 |
| <i>Tcra-Hmgb1</i>  | 39 / 252       | 15.5 | 32 / 212                | 15.1 | 66 / 346       | 19.1 |
| <i>Tcra-Gapdh</i>  | 26 / 200       | 13   | 31 / 256                | 12.1 | 68 / 332       | 20.5 |
| <i>Tcra-Lat</i>    | 21 / 252       | 8.3  | 35 / 212                | 16.5 | 81 / 346       | 23.4 |
| <i>Tcra-Cd3g</i>   | 28 / 200       | 14   | 60 / 256                | 23.4 | 87 / 332       | 26.2 |
| <i>Tcra-Ly6d</i>   | 21 / 252       | 8.3  | 24 / 212                | 11.3 | 58 / 346       | 16.8 |
| <i>Tcra-Satb1</i>  | 14 / 200       | 7    | 36 / 256                | 14.1 | 57 / 332       | 17.2 |
| <i>Tcra-Igh</i>    | 184 / 892      | 20.6 | 90 / 664                | 13.6 | 76 / 648       | 11.7 |
| <i>Hmgb1-Ly6d</i>  | 19 / 252       | 7.5  | 25 / 212                | 11.8 | 62 / 346       | 17.9 |
| <i>Hmgb1-Lat</i>   | 20 / 252       | 7.9  | 28 / 212                | 13.2 | 74 / 346       | 21.4 |
| <i>Ly6d-Lat</i>    | 22 / 252       | 8.3  | 30 / 212                | 14.2 | 81 / 346       | 23.4 |
| <i>Gapdh-Satb1</i> | 14 / 200       | 7    | 28 / 256                | 10.9 | 43 / 332       | 13   |
| <i>Gapdh-Cd3g</i>  | 11 / 200       | 5.5  | 36 / 256                | 14.1 | 66 / 332       | 19.9 |
| <i>Satb1-Cd3g</i>  | 10 / 200       | 5    | 24 / 256                | 9.4  | 51 / 332       | 15.4 |

**Supplementary Table S8.**Looping out of *Tcra* and/or *Igh* from their chromosome territories in *Tcra-Igh* pairs in DP cells (Fig. 6a).

| Paired loci                                                                      | No loop |      | <i>Tcra</i> loops                |      | <i>Tcra</i> and <i>Igh</i> loops |      | <i>Igh</i> loops |       | Sample size<br>(pairs) |
|----------------------------------------------------------------------------------|---------|------|----------------------------------|------|----------------------------------|------|------------------|-------|------------------------|
|                                                                                  | number  | %    | number                           | %    | number                           | %    | number           | %     |                        |
| WT                                                                               | 68      | 75.6 | 16                               | 17.8 | 1                                | 1.1  | 5                | 5.6   | 90                     |
| <i>Atm</i> <sup>-/-</sup>                                                        | 24      | 43.6 | 24                               | 43.6 | 4                                | 7.3  | 3                | 5.5   | 55                     |
| <i>Rag2</i> <sup>c/c</sup> <i>p53</i> <sup>-/-</sup>                             | 27      | 48.2 | 17                               | 30.4 | 8                                | 14.3 | 4                | 7.1   | 56                     |
| <i>Statistical analysis (two-tail <math>\chi^2</math> or Fisher exact test):</i> |         |      |                                  |      |                                  |      | <i>P</i> -value  | Level |                        |
| WT vs. <i>Atm</i> <sup>-/-</sup>                                                 |         |      | Entire distribution              |      |                                  |      | 5.50e-4          | ***   |                        |
|                                                                                  |         |      | <i>Tcra</i> and <i>Igh</i> loops |      |                                  |      | 4.55e-2          | *     |                        |
| WT vs. <i>Rag2</i> <sup>c/c</sup> <i>p53</i> <sup>-/-</sup>                      |         |      | Entire distribution              |      |                                  |      | 1.01e-3          | **    |                        |
|                                                                                  |         |      | <i>Tcra</i> and <i>Igh</i> loops |      |                                  |      | 1.29e-3          | **    |                        |

**Supplementary Table S9.**Frequency of PCH association of *Tcra* and/or *Igh* alleles in *Tcra-Igh* pairs in DP cells (Fig. 5c).

| Paired loci                                                                      | No PCH association |      | PCH association of: |     |                                 |     | Sample size<br>(pairs) |            |
|----------------------------------------------------------------------------------|--------------------|------|---------------------|-----|---------------------------------|-----|------------------------|------------|
|                                                                                  | number             | %    | <i>Tcra</i>         |     | Both <i>Tcra</i> and <i>Igh</i> |     |                        | <i>Igh</i> |
|                                                                                  | number             | %    | number              | %   | number                          | %   | number                 | %          |
| WT                                                                               | 132                | 60.6 | 9                   | 4.1 | 16                              | 7.3 | 61                     | 28         |
| <i>Atm</i> <sup>-/-</sup>                                                        | 148                | 81.3 | 10                  | 5.5 | 2                               | 1.1 | 22                     | 12.1       |
| <i>Rag2</i> <sup>c/c</sup> <i>p53</i> <sup>-/-</sup>                             | 160                | 87   | 6                   | 3.3 | 1                               | 0.5 | 17                     | 9.2        |
| <i>Statistical analysis (two-tail <math>\chi^2</math> or Fisher exact test):</i> |                    |      |                     |     |                                 |     | <i>P</i> -value        | Level      |
| WT vs. <i>Atm</i> <sup>-/-</sup>                                                 |                    |      |                     |     |                                 |     | 5.40e-6                | ***        |
| WT vs. <i>Rag2</i> <sup>c/c</sup> <i>p53</i> <sup>-/-</sup>                      |                    |      |                     |     |                                 |     | 2.00e-8                | ***        |

**Supplementary Table S10.**Frequency of damage on both *Tcra* and *Igh* in individual DP cells (Fig. 5e).

| <i>Tcra</i> and <i>Igh</i>                                  | No damage on both loci |      | Damage on both loci |     | Sample size<br>(cells) |
|-------------------------------------------------------------|------------------------|------|---------------------|-----|------------------------|
|                                                             | number                 | %    | number              | %   |                        |
| WT                                                          | 329                    | 99.7 | 1                   | 0.3 | 330                    |
| <i>53bp1</i> <sup>-/-</sup>                                 | 171                    | 100  | 0                   | 0   | 171                    |
| <i>Atm</i> <sup>-/-</sup>                                   | 177                    | 91.2 | 17                  | 8.8 | 194                    |
| <i>Rag2</i> <sup>c/c</sup> <i>p53</i> <sup>-/-</sup>        | 116                    | 92.8 | 9                   | 7.2 | 125                    |
| <i>Statistical analysis (Fisher exact test):</i>            |                        |      | <i>P</i> -value     |     | Level                  |
| WT vs. <i>53bp1</i> <sup>-/-</sup>                          |                        |      | 4.71e-1             |     | ns                     |
| WT vs. <i>Atm</i> <sup>-/-</sup>                            |                        |      | 2.80e-7             |     | ***                    |
| WT vs. <i>Rag2</i> <sup>c/c</sup> <i>p53</i> <sup>-/-</sup> |                        |      | 7.50e-6             |     | ***                    |
